# Supplementary material for: High performance polyurethane–polyacrylic acid polymer binders for silicon microparticle anodes in lithium-ion batteries
Source: Royal Society of Chemistry journal article supplement (doi:10.1039/d1se01820e), 2022-01-01
Supplement: d1se01820e4.pdf [file d1se01820e4.pdf]

## Electronic Supplementary Information

### High performance polyurethane-polyacrylic acid polymer binders for silicon microparticle anodes in lithium-ion batteries

Sulin Niu,<sup>a</sup> Min Zhao,<sup>b</sup> Lei Ma,<sup>a</sup> Fangfang Zhao,<sup>a</sup> Yu Zhang,<sup>a</sup> Gen Tang,<sup>b</sup> Yue Wang,<sup>b</sup>

Aimin Pang,<sup>\*b</sup> Wei Li,<sup>\*b</sup> and Liangming Wei<sup>\*a</sup>

<sup>a</sup>Key Laboratory for Thin Film and Microfabrication Technology of the Ministry of Education, Department of Microelectronics and Nanoscience, School of Electronics Information and Electrical Engineering, Shanghai Jiao Tong University, Dong Chuan Road No. 800, Shanghai 200240, China

<sup>b</sup>Science and Technology on Aerospace Chemical Power Laboratory, Hubei Institute of Aerospace Chemotechnology, Xiangyang 441003, Hubei, China

\*Corresponding authors. E-mail address: ppam@tom.com,

gracelee@mail.ustc.edu.cn lmwei@sjtu.edu.cn

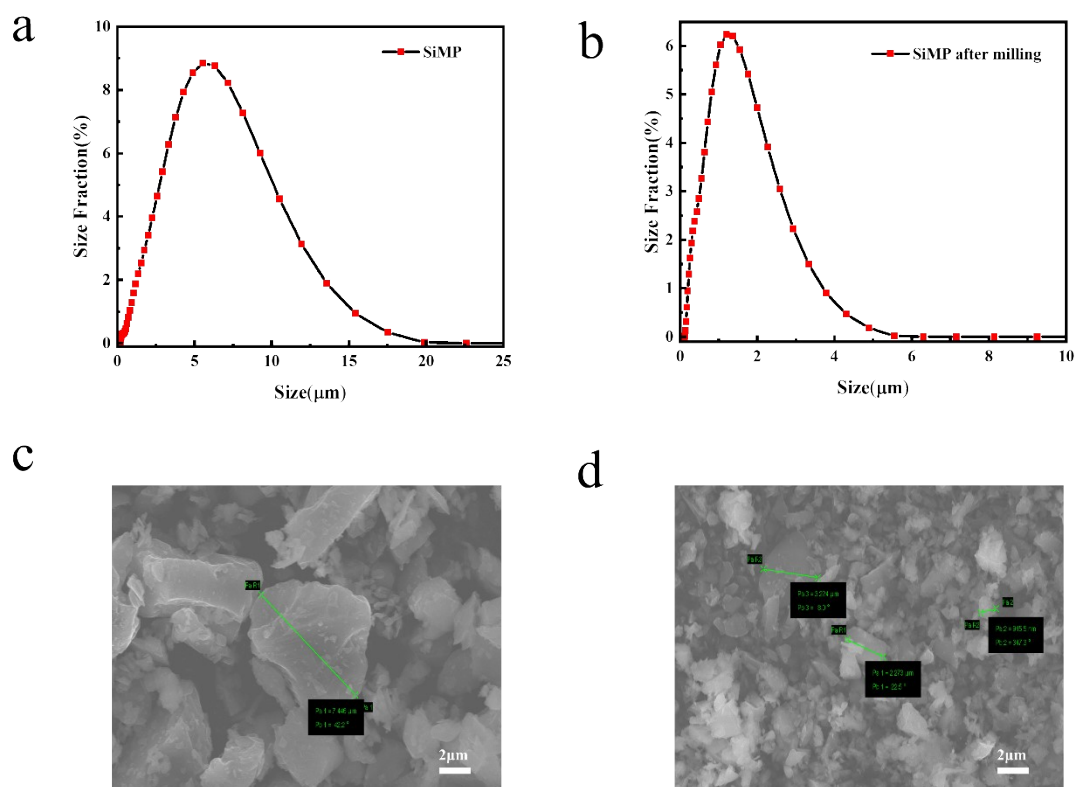

**Fig. S1** The particle size distributions of (a) SiMP, (b) SiMP after milling and morphology of (c) SiMP, (d) SiMP after milling

**Table S1** The cycling performances of multi-proportion PU-PAA binders

|                                                    | PU-PAA-21 | PU-PAA-11 | PU-PAA-12 |
|----------------------------------------------------|-----------|-----------|-----------|
| The initial discharge capacity (mAh/g)             | 3782      | 3592      | 3339      |
| The coulombic efficiency of the first cycle (%)    | 88.2      | 89.6      | 90.2      |
| The discharge capacity of the second cycle (mAh/g) | 3486      | 3420      | 3176      |
| The discharge capacity after 100 cycles (mAh/g)    | 2368      | 2455      | 2458      |
| The discharge capacity after 200 cycles (mAh/g)    | 2132      | 2166      | 2251      |
| The capacity retention after 200 cycles (%)        | 61.0      | 63.3      | 70.9      |

**Table S2** The comparison of electrodes using PU-PAA-12 binder and other composite binders

| Binders                           | Materials         | Cyclability                                                                                                                                                                                 |
|-----------------------------------|-------------------|---------------------------------------------------------------------------------------------------------------------------------------------------------------------------------------------|
| PU-PAA-12                         | Si microparticles | 2458 mAh/g after 100 cycles (840 mA/g)<br>2251 mAh/g and capacity retention of 70.9% after 200 cycles (840 mA/g)<br>1934 mAh/g and capacity retention of 60.9 % after 500 cycles (840 mA/g) |
| PAL-NaPAA (2018) <sup>1</sup>     | Si microparticles | 1914 mAh/g after 100 cycles (840 mA/g)                                                                                                                                                      |
| PAA-borax (2020) <sup>2</sup>     | Si microparticles | 2470 mAh/g after 100 cycles (500 mA/g)                                                                                                                                                      |
| CMC-NaPAA-PAM (2019) <sup>3</sup> | Si nanoparticles  | 1210 mAh/g after 150 cycles (420 mA/g)                                                                                                                                                      |
| PAA/PVB (2019) <sup>4</sup>       |                   | 2170 mAh/g after 100 cycles (250 mA/g)                                                                                                                                                      |
| OS-PAA (2021) <sup>5</sup>        | Si nanoparticles  | 1386 mAh/g and capacity retention of 40.2% after 100 cycles (200 mA/g)                                                                                                                      |
| PDA-PAA (2021) <sup>6</sup>       | Si nanoparticles  | 1410 mAh/g and capacity retention of 56.0% after 500 cycles (840 mA/g)                                                                                                                      |

**Table S3** The mass loading of the Si anodes

| Si anodes                                             | mass loading (mg/cm <sup>2</sup> ) |
|-------------------------------------------------------|------------------------------------|
| PU-PAA-21 electrode for 0.2 C (840 mAh/g)             | 0.27                               |
| PU-PAA-11 electrode for 0.2 C (840 mAh/g)             | 0.42                               |
| PU-PAA-12 electrode for 0.2 C (840 mAh/g)             | 0.41                               |
| PU electrode for 0.2 C (840 mAh/g)                    | 0.34                               |
| PAA electrode for 0.2 C (840 mAh/g)                   | 0.39                               |
| PU-PAA-12 electrode for rate performance              | 0.35                               |
| PAA electrode for rate performance                    | 0.40                               |
| PU-PAA-12 electrode with constant capacity conditions | 0.37                               |
| PU-PAA-12 electrode with high load                    | 0.98                               |

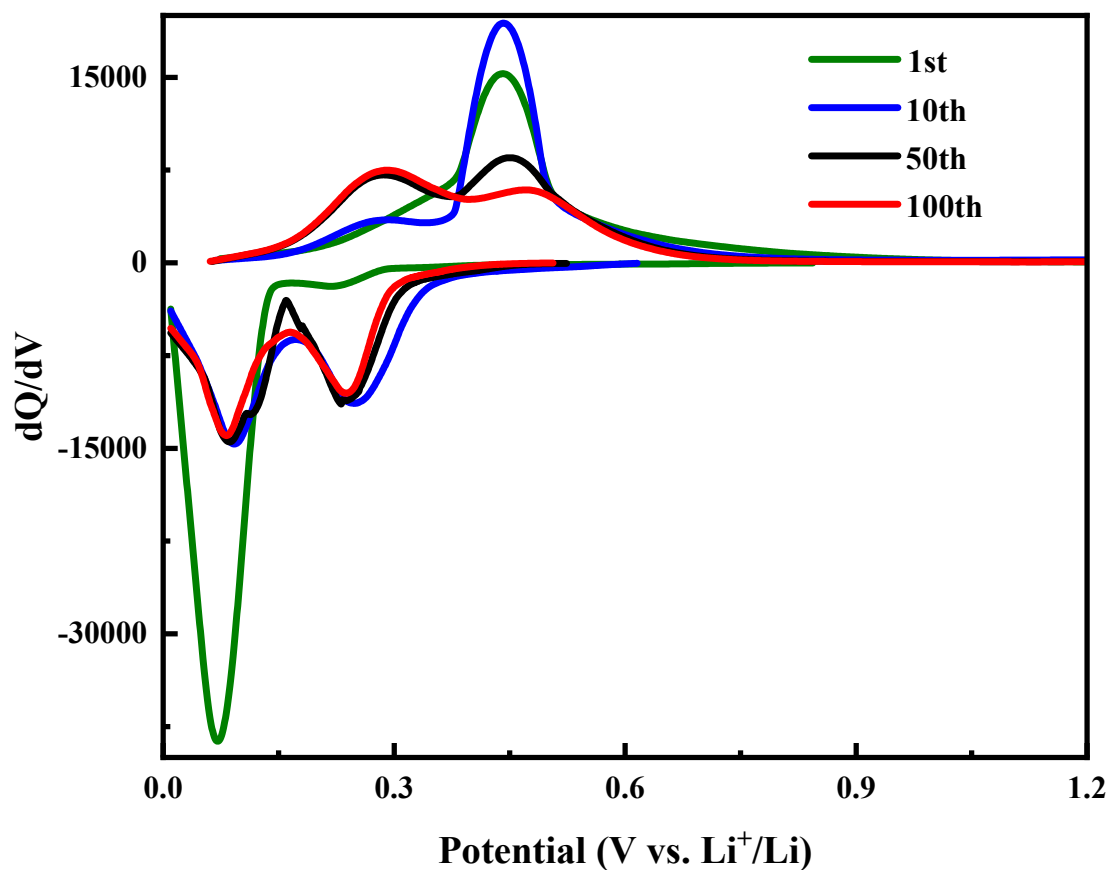

**Fig. S2** The  $dQ/dV$  derivatives at cycle 1, 10, 50, 100 of PU-PAA electrode

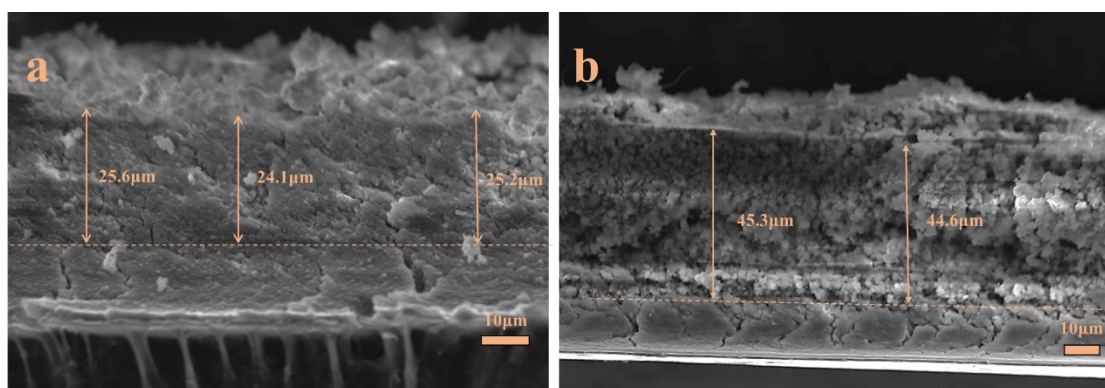

**Fig. S3** Cross-sectional SEM images of PAA electrode (a) before cycling and (b) after 30

cycles

## References

1. C. Luo, L. Du, W. Wu, H. Xu, G. Zhang, S. Li, C. Wang, Z. Lu and Y. Deng, *ACS Sustainable Chemistry & Engineering*, 2018, **6**, 12621-12629.
2. S. Wang, Q. Duan, J. Lei and D. Y. W. Yu, *Journal of Power Sources*, 2020, **468**, 228365.

3. L. Yu, J. Liu, S. He, C. Huang, L. Gan, Z. Gong and M. Long, *Journal of Physics and Chemistry of Solids*, 2019, **135**, 109113.
4. A. Urbanski, A. Omar, J. Guo, A. Janke, U. Reuter, M. Malanin, F. Schmidt, D. Jehnichen, M. Holzschuh, F. Simon, K.-J. Eichhorn, L. Giebeler and P. Uhlmann, *Journal of The Electrochemical Society*, 2019, **166**, A5275-A5286.
5. X. Hu, K. Liang, J. Li and Y. Ren, *Materials Today Communications*, 2021, **28**, 102530.
6. Y. Zhang, X. Wang, L. Ma, R. Tang, X. Zheng, F. Zhao, G. Tang, Y. Wang, A. Pang, W. Li and L. Wei, *Powder Technology*, 2021, **388**, 393-400.
