# Supplementary figures and images for: High performance polyurethane–polyacrylic acid polymer binders for silicon microparticle anodes in lithium-ion batteries
Source: Royal Society of Chemistry journal article supplement (doi:10.1039/d1se01820e), 2022-01-01

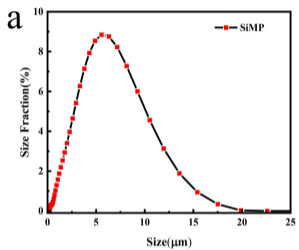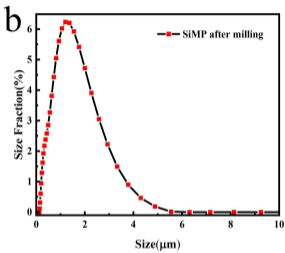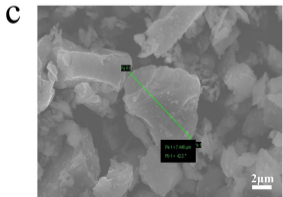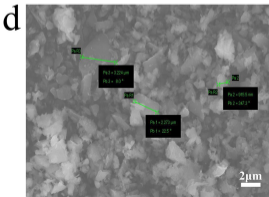

Supplement: d1se01820e1.pdf [file d1se01820e1.pdf]

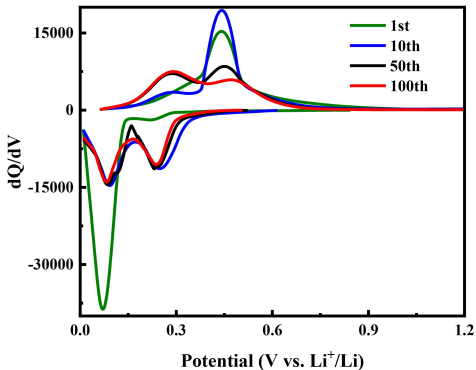

Supplement: d1se01820e2.pdf [file d1se01820e2.pdf]

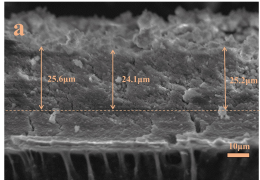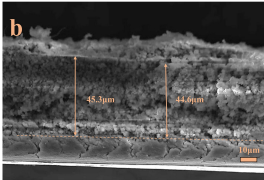

Supplement: d1se01820e3.pdf [file d1se01820e3.pdf]
